# Supplementary material
Source: HighWire-hosted journal article supplement (https://jitc.bmj.com/content/6/1/123)

# Supplemental Figure 1 : Immune parameters correlation

**A**

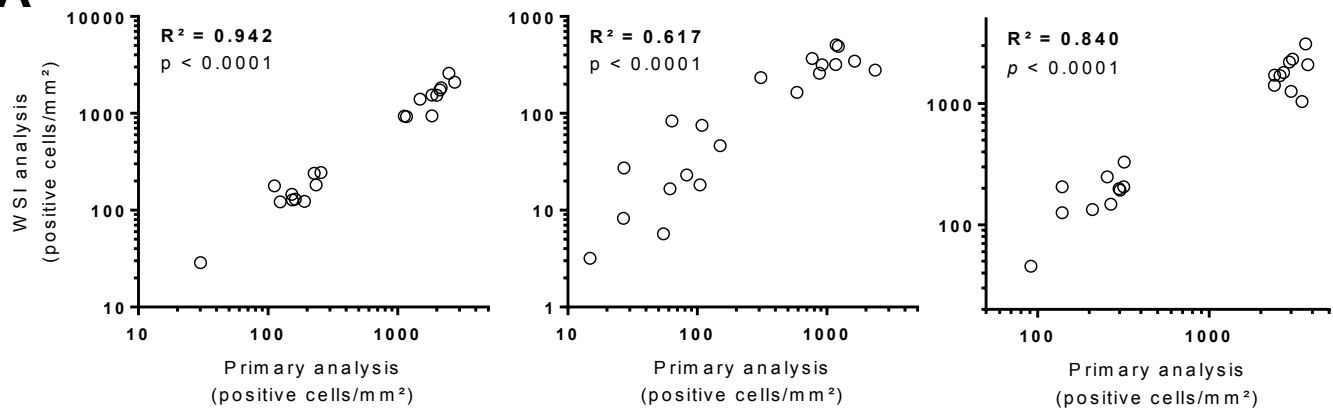

**B**

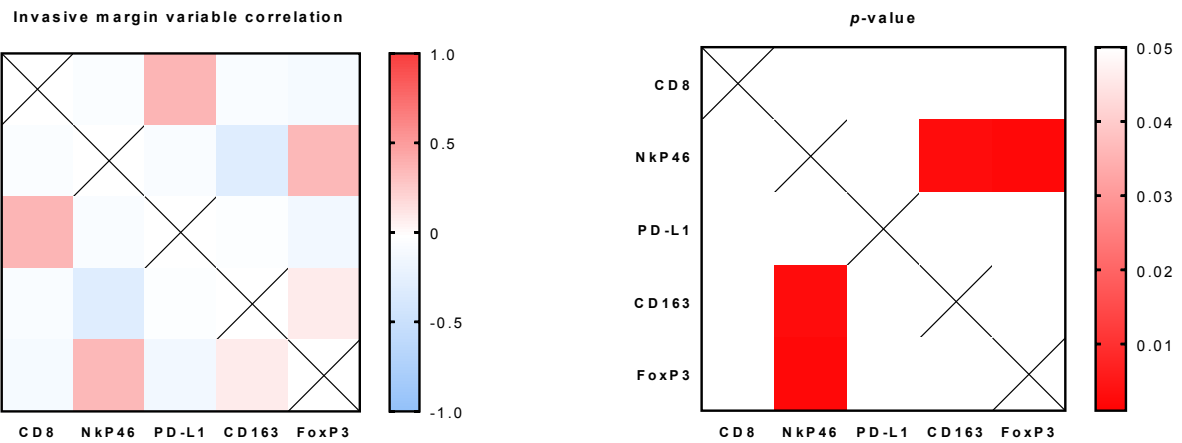

**C**

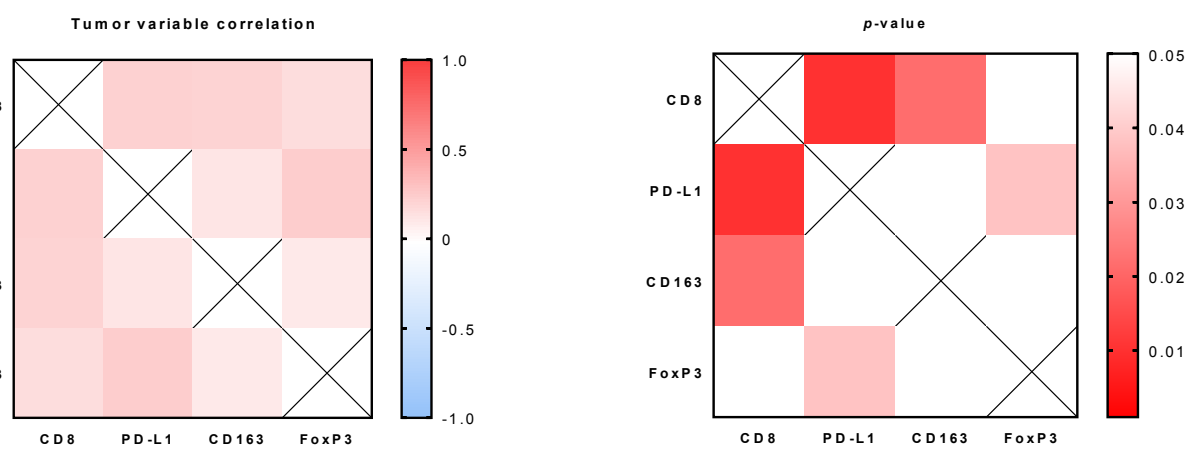

**D**

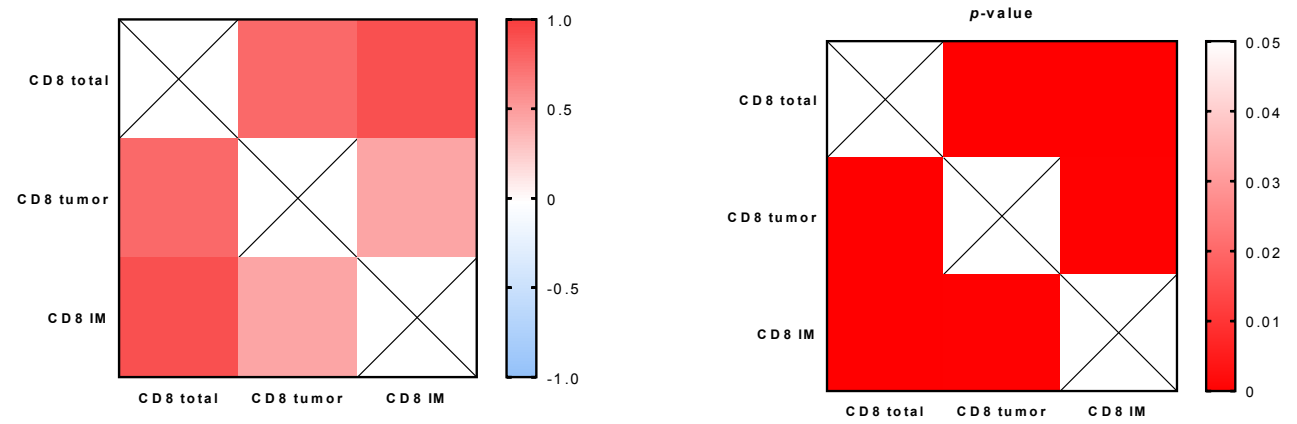

# Supplemental Figure 2 : Impact of Ras-Raf mutationnal status tumor environment

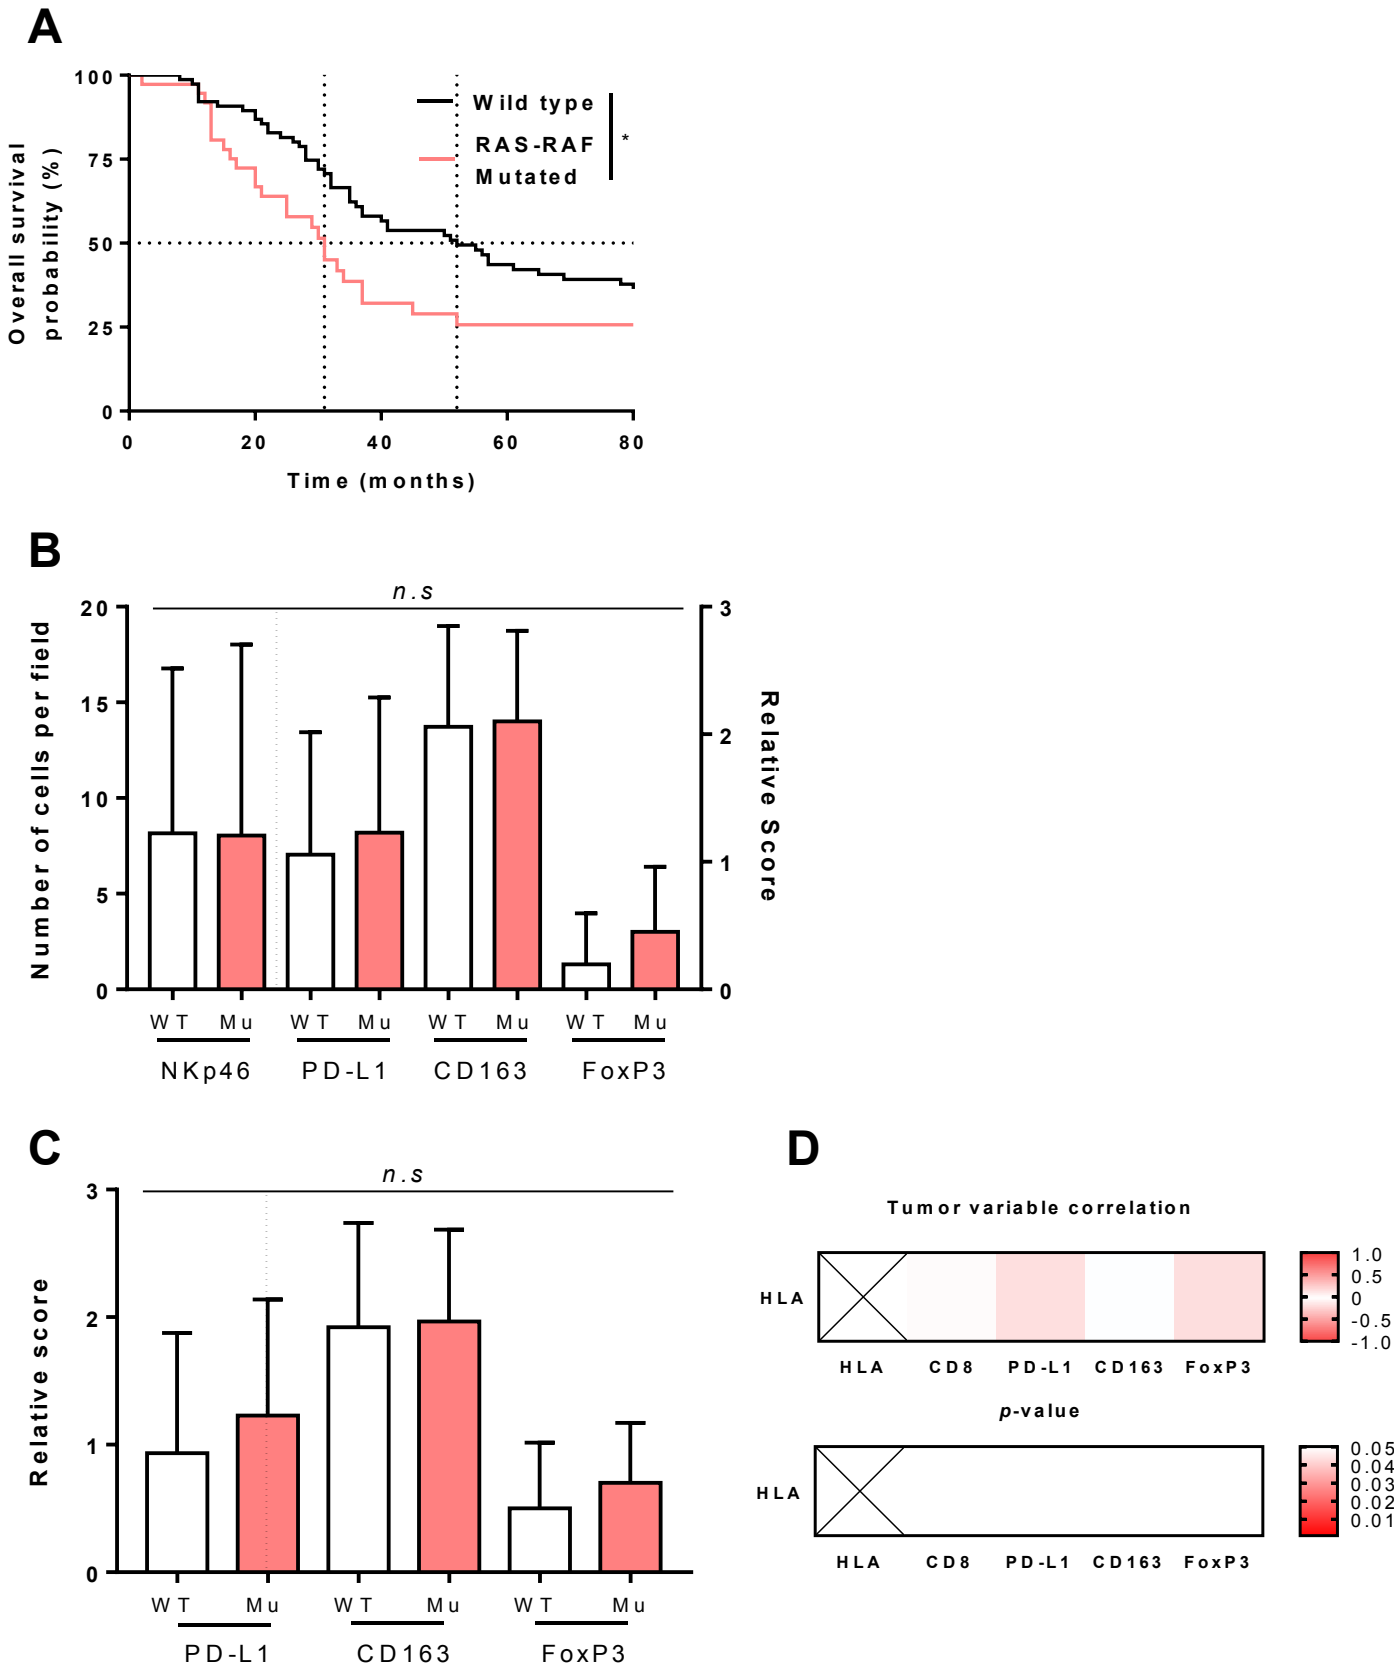

# Supplemental Figure 3 : HLA score and CD8 positive cells combination as prognostic factor

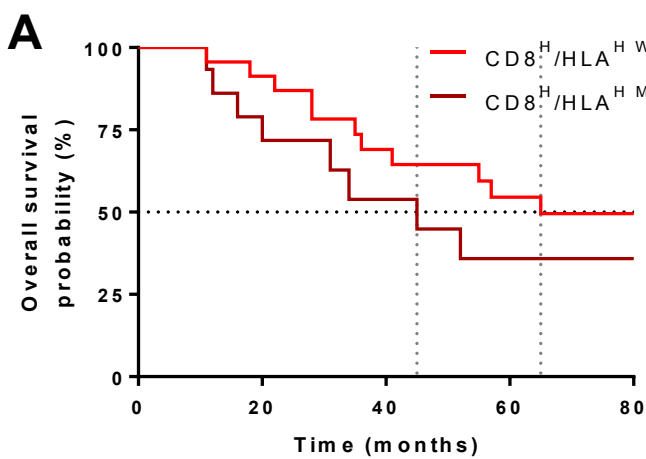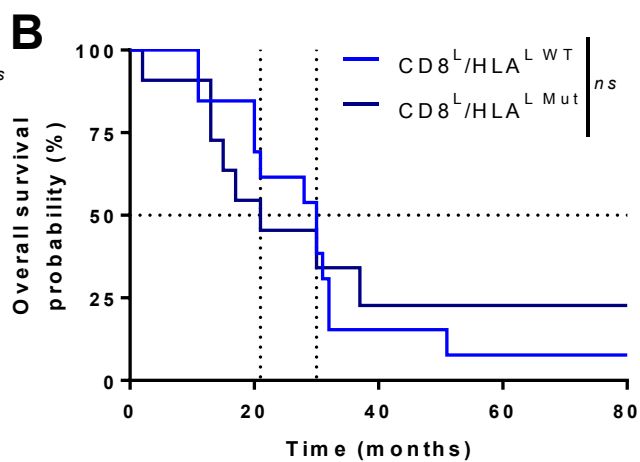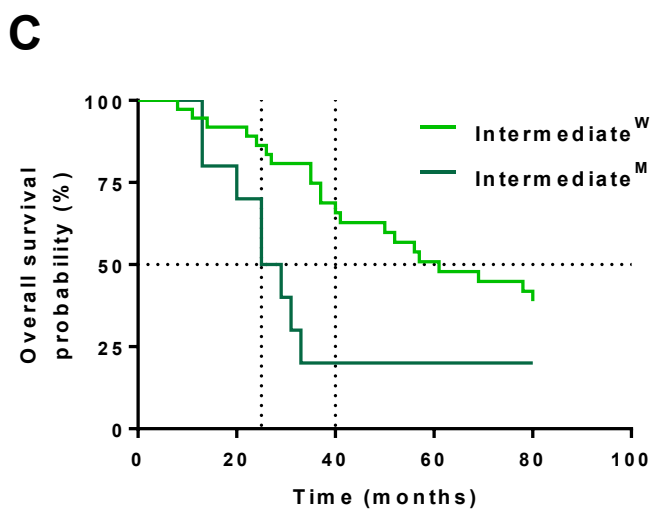

**Supplemental Figure 4 : Impact of neoadjuvant chemotherapy on immune infiltrates**

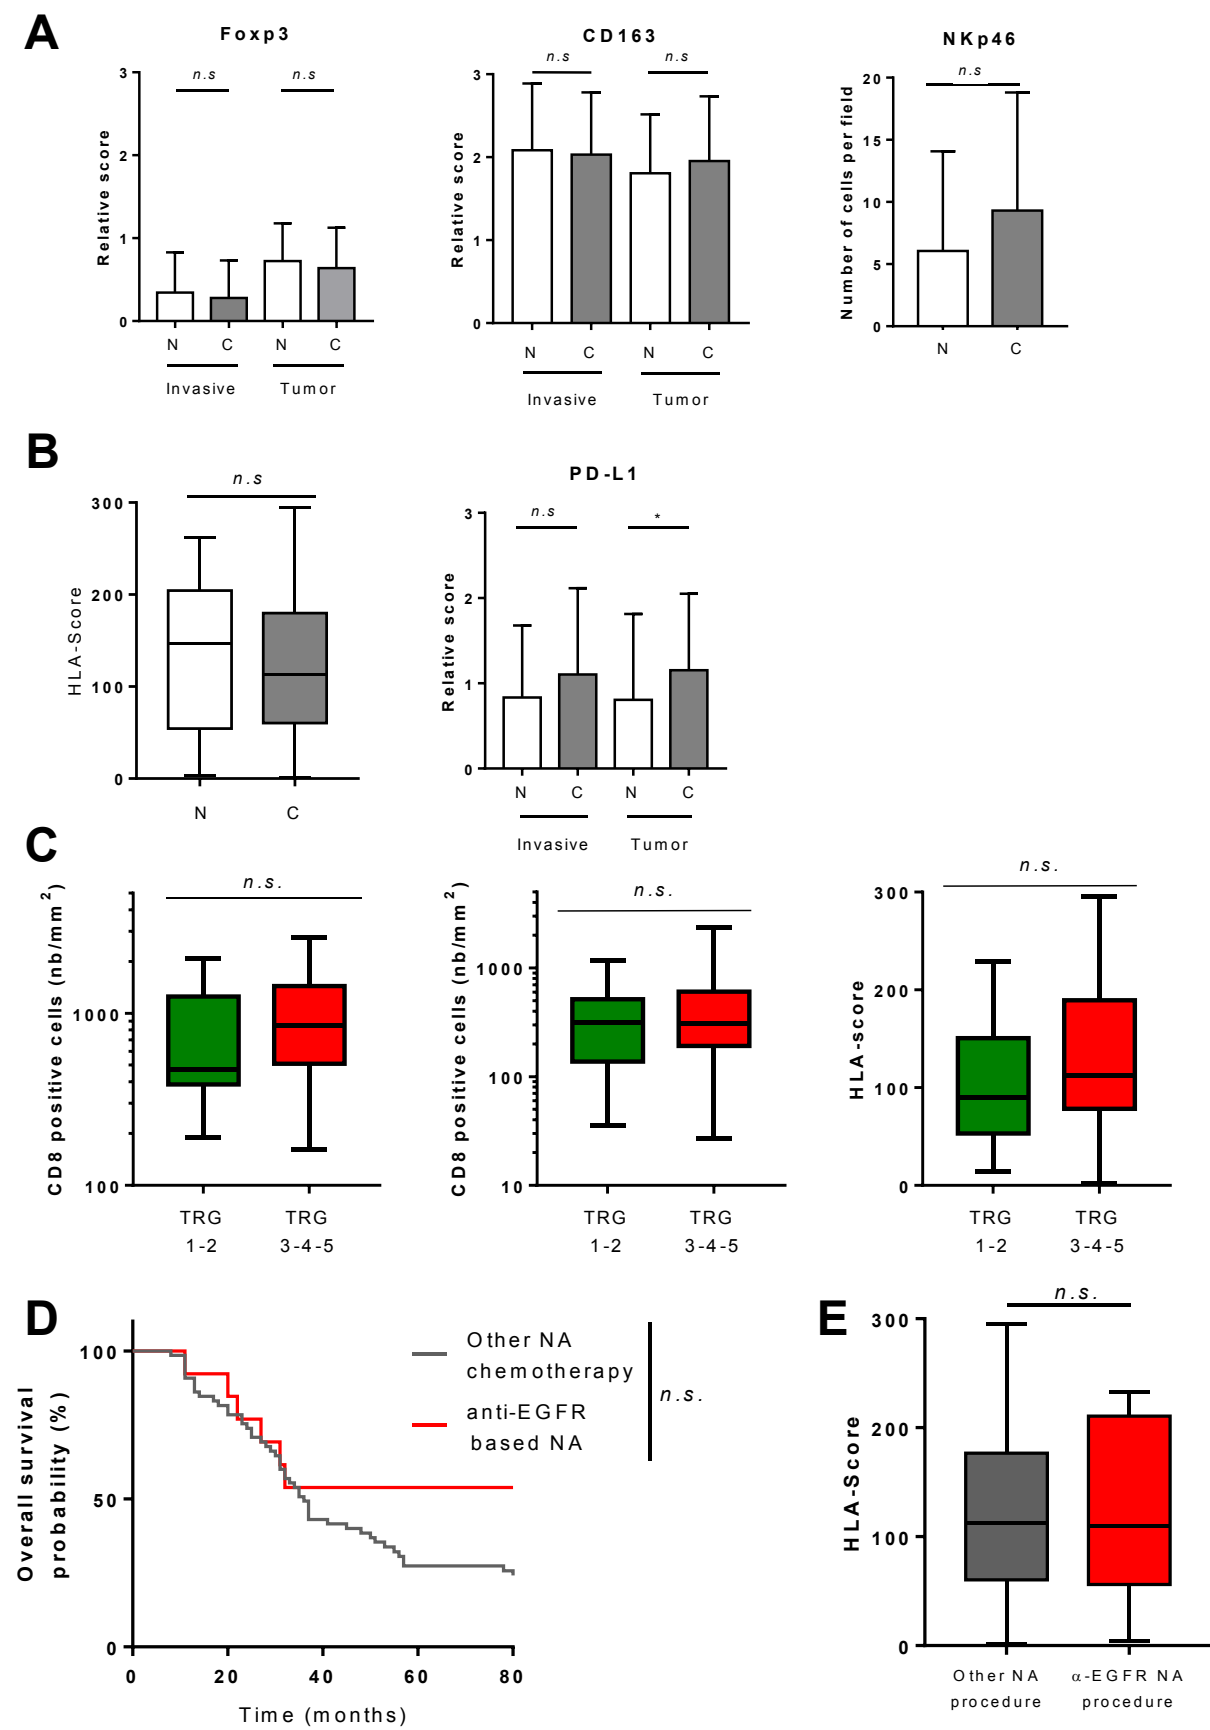

**Supplemental Figure 5 : CD8+ cells’ recruitment modifies tumor stroma making mCRC eligible for immune therapeutic intervention**

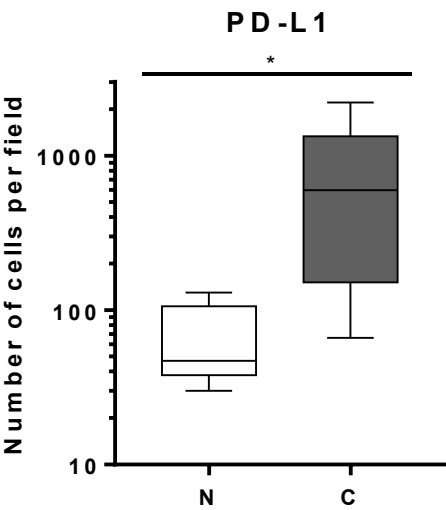

Supplement: media-2 [file media-2.zip]
